# Supplementary material
Source: Springer Nature journal article supplement (https://www.springermedizin.de/resource/supplementary/12958_2009_538_MOESM5_ESM.pdf/9568256)

(A)

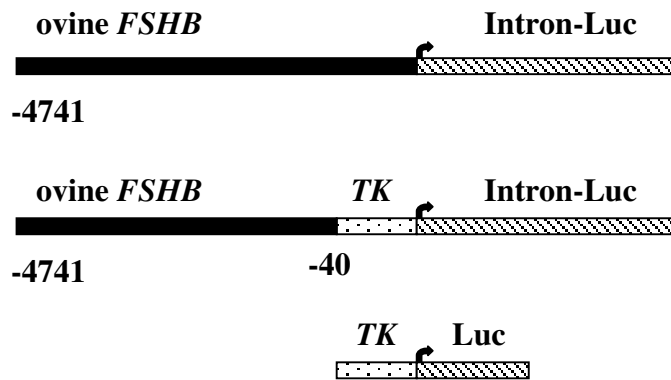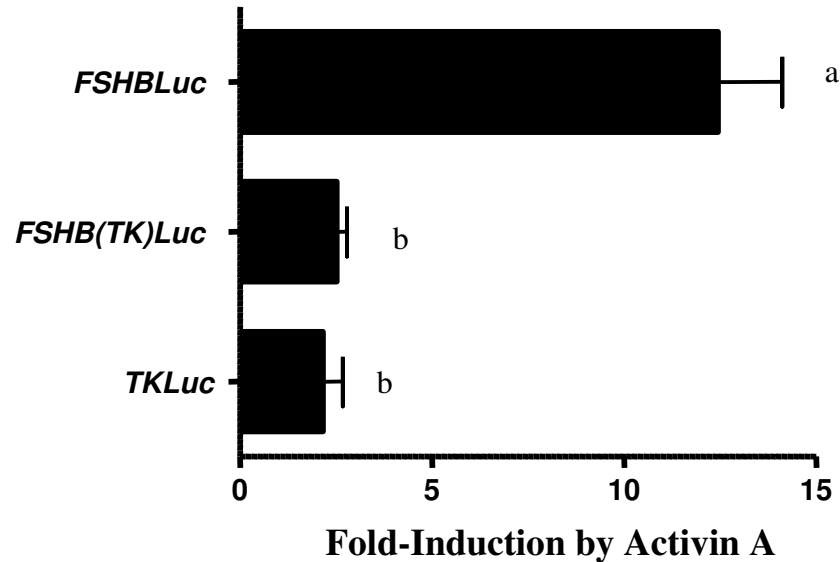

(B)

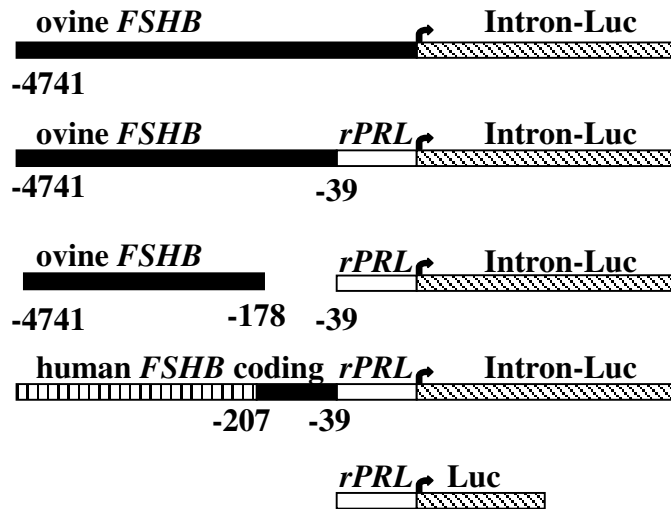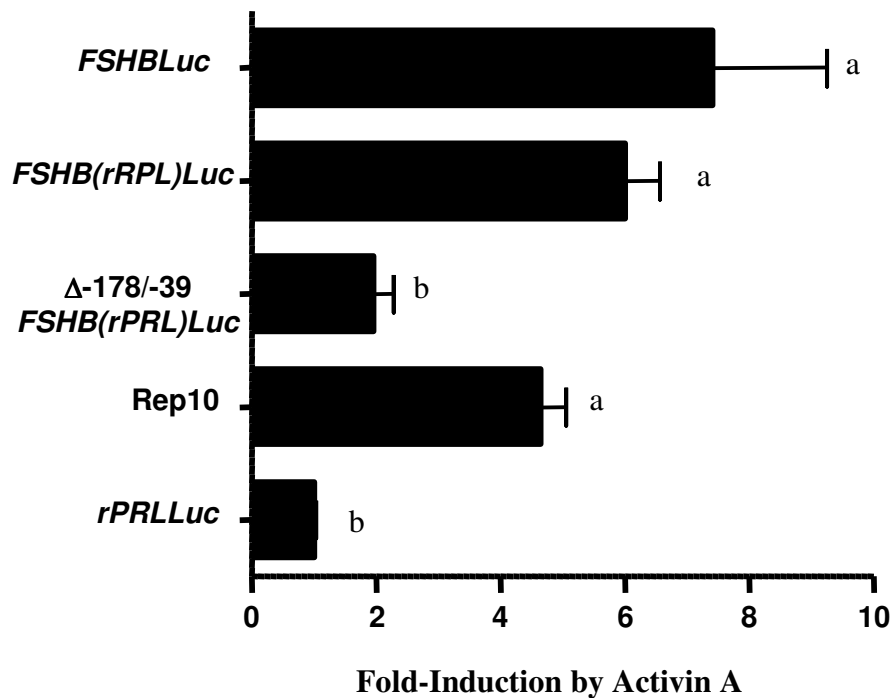

Supplement: MOESM5 [file 9568256]
